# Supplementary material
Source: PubMed Central journal article supplement (PMC4120856)
Supplement: NIHMS554253-supplement-Supp_Table_S1-S8___Fig_S1-S2.pdf [file NIHMS554253-supplement-Supp_Table_S1-S8___Fig_S1-S2.pdf]

Supplementary Table 1. Numbers of quality filtered Illumina reads from ovary, teratocyte, venom gland and larval sequence libraries that were included in the parasitism transcriptome assembly. Single reads had low quality partners that were excluded from the dataset.

| <b>Tissue or cell type</b> | <b>Ovaries</b>          | <b>Teratocytes</b>     | <b>Venom gland</b>      | <b>Larvae</b>           |
|----------------------------|-------------------------|------------------------|-------------------------|-------------------------|
| Read pairs                 | 51,673,982              | 49,507,250             | 68,219,085              | 47,827,562              |
| Single reads               | 9,781,812               | 8,154,144              | 11,029,183              | 10,286,276              |
| Total reads                | 113,129,776             | 107,168,644            | 147,467,353             | 105,941,400             |
| Reads Mapped               | 109,022,310<br>(96.37%) | 95,279,474<br>(88.91%) | 143,699,728<br>(97.45%) | 102,621,862<br>(96.87%) |

Supplementary Table 2. Venom data set. All loci have an RPKM greater than 50 in venom, are upregulated greater than 50-fold compared to ovary expression, and their corresponding protein product is detected in venom gland reservoirs. Abbreviations for species names are as follows: Ci: *Chelonus inanitus*, Cr: *Cotesia rubecula*, Ep1: *Eumenes pomiformis*, Eo: *Eupelmus orientalis*, Hd: *Hyposoter didymator*, Lb: *Leptopilina boulandi*, Ma: *Microctonus aethioides*, Mh: *Microctonus hyperodae*, Ph: *Pimpla hypochondriaca*, Pp2: *Pteromalus puparum*, and Nv: *Nasonia vitripennis*.

| Locus        | Ovaries | Teratocytes | Venom  | Larvae | Venom unique peptide matches | Teratocyte unique peptide matches | Putative function                                                                 | Signal peptide | Direct orthologs | Functional class previously identified in Braconids | Functional class previously identified in other parasitic wasps | References     |
|--------------|---------|-------------|--------|--------|------------------------------|-----------------------------------|-----------------------------------------------------------------------------------|----------------|------------------|-----------------------------------------------------|-----------------------------------------------------------------|----------------|
| comp33950_c0 | 5       | 497         | 12638  | 5      | 8                            | 5                                 | metalloprotease-like, reprotolysin family                                         | Y              | Ci               | Ci                                                  | Lb, Lh                                                          | [1, 13, 15]    |
| comp40703_c0 | 1       | 46          | 59     | 8      | 2                            | 2                                 | esterase/lipase-like, Ci-50                                                       | Y              | Ci               | Ci                                                  | Hd, Lb, Lh, Nv                                                  | [1-3, 13, 15]  |
| comp36551_c0 | 5       | 0           | 17536  | 7      | 9                            |                                   | Ci-48a-like                                                                       | N              | Ma, Mh, Ci, Nv   | Ma, Mh, Ci                                          | Nv                                                              | [1, 3, 4]      |
| comp17585_c0 | 3       | 0           | 7863   | 14     | 13                           |                                   | Ci-48a-like                                                                       | Y              | Ma, Mh, Ci, Nv   | Ma, Mh, Ci                                          | Nv                                                              | [1, 3, 4]      |
| comp36791_c0 | 5       | 0           | 2439   | 1      | 11                           |                                   | Ci-48a-like                                                                       | Y              | Ma, Mh, Ci, Nv   | Ma, Mh, Ci                                          | Nv                                                              | [1, 3, 4]      |
| comp37198_c0 | 1       | 1           | 725    | 1      | 5                            |                                   | Ci-48a-like                                                                       | N              | Ma, Mh, Ci, Nv   | Ma, Mh, Ci                                          | Nv                                                              | [1, 3, 4]      |
| comp35049_c0 | 7       | 2           | 1170   | 2      | 8                            |                                   | Ci-48a-like                                                                       | Y              | Ma, Mh, Ci, Nv   | Ma, Mh, Ci                                          | Nv                                                              | [1, 3, 4]      |
| comp17908_c0 | 3       | 3           | 3462   | 5      | 3                            |                                   | unknown, PBP/GOBP family, baculovirus protein of unknown function (DUF816) domain | Y              |                  | Ci                                                  |                                                                 | [1]            |
| comp21422_c0 | 1       | 8           | 1414   | 1      | 18                           |                                   | seminal fluid protein, glycosyl hydrolase family                                  | Y              |                  | Ci                                                  | Eo, Lb, Lh                                                      | [1, 5, 15]     |
| comp36944_c0 | 0       | 1449        | 922    | 0      | 2                            | 4                                 | serine protease snake                                                             | Y              |                  | Ci, Cr                                              | Nv, Pp2, Ph, Hd, Lh                                             | [1-3, 6-8, 13] |
| comp37513_c0 | 1       | 0           | 351    | 0      | 2                            |                                   | serine carboxypeptidase                                                           | Y              |                  | Ci, Cr                                              | Nv, Pp2, Ph, Hd, Lh                                             | [1-3, 8, 13]   |
| comp17613_c0 | 257     | 2           | 423421 | 115    | 7                            |                                   | unknown, cysteine rich conotoxin superfamily                                      | Y              |                  | Ma, Mh, Ci                                          |                                                                 | [1, 4]         |
| comp21557_c0 | 11      | 1952        | 17904  | 5      | 19                           | 19                                | zinc metalloprotease, reprotolysin family                                         | Y              |                  | Ci                                                  | Ep1, Nv, Hd, Ph                                                 | [2, 3, 7, 9]   |

|              |    |       |        |    |    |   |                                                               |   |  |            |            |                 |
|--------------|----|-------|--------|----|----|---|---------------------------------------------------------------|---|--|------------|------------|-----------------|
| comp36550_c0 | 12 | 1052  | 11067  | 37 | 2  |   | viral cysteine rich-domain containing protein                 | Y |  | Ma, Mh, Ci |            | [1, 4]          |
| comp17591_c0 | 1  | 41    | 3172   | 1  | 3  |   | serpin                                                        | Y |  |            | Lb, Lh, Hd | [4, 10, 13, 15] |
| comp38077_c0 | 3  | 0     | 224    | 0  | 3  |   | phospholipase A2                                              | N |  |            | Nv         | [3]             |
| comp21649_c0 | 3  | 3     | 2847   | 1  | 3  |   | conserved protein, domain of unknown function (DUF4339)       | N |  |            |            |                 |
| comp36655_c0 | 56 | 0     | 6425   | 4  | 9  |   | deoxyribonuclease II, plancitoxin                             | Y |  |            |            |                 |
| comp37062_c0 | 2  | 653   | 388    | 0  | 10 |   | Nucleopolyhedrovirus p26 protein                              | Y |  |            |            |                 |
| comp37102_c0 | 17 | 114   | 952    | 18 | 9  |   | polynucleotide kinase 3 phosphatase domain-containing protein | Y |  |            |            |                 |
| comp36886_c0 | 3  | 66    | 2114   | 1  | 10 |   | protease domain-containing protein                            | Y |  |            |            |                 |
| comp21649_c1 | 1  | 1     | 1469   | 0  | 2  |   | conserved uncharacterized protein                             | N |  |            |            |                 |
| comp36950_c0 | 1  | 23    | 935    | 11 | 2  |   | conserved uncharacterized protein                             | Y |  |            |            |                 |
| comp36917_c0 | 1  | 1004  | 116    | 10 | 3  |   | conserved uncharacterized protein                             | Y |  |            |            |                 |
| comp29658_c0 | 33 | 13629 | 117556 | 35 | 15 | 9 | unknown                                                       | Y |  |            |            |                 |
| comp36535_c0 | 38 | 3     | 76709  | 25 | 12 |   | unknown                                                       | Y |  |            |            |                 |
| comp36593_c0 | 1  | 0     | 4138   | 1  | 2  |   | unknown                                                       | N |  |            |            |                 |
| comp36807_c0 | 4  | 0     | 3793   | 1  | 3  |   | unknown                                                       | N |  |            |            |                 |
| comp17570_c0 | 4  | 88    | 2519   | 20 | 3  |   | unknown                                                       | Y |  |            |            |                 |
| comp21649_c2 | 4  | 2     | 1884   | 1  | 4  |   | unknown                                                       | Y |  |            |            |                 |

Supplementary Table 3. Teratocyte data set. All loci have an RPKM greater than 50 in teratocytes, are upregulated greater than 50-fold compared to ovary expression, and their corresponding protein product is detected in teratocyte conditioned media. Abbreviations for species names are as follows: Ci: *Chelonus inanitus*, Cr: *Cotesia rubecula*, Dc: *Dinocampus coccinellae*, Ep1: *Eumenes pomiformis*, Eo: *Eupelmus orientalis*, Hd: *Hyposoter didymator*, Ma: *Microctonus aethioides*, Mc: *Microplitis crocipes*, Mh: *Microctonus hyperodae*, Ph: *Pimpla hypochondriaca*, Pp2: *Pteromalus puparum*, and Nv: *Nasonia vitripennis*.

| Locus        | Ovaries | Teratocytes | Venom | Larvae | Venom unique peptide matches | Teratocyte unique peptide matches | Putative function                                           | Signal peptide | Direct orthologs | Functional class previously identified in Braconids | Functional class previously identified in other parasitic wasps | References              |
|--------------|---------|-------------|-------|--------|------------------------------|-----------------------------------|-------------------------------------------------------------|----------------|------------------|-----------------------------------------------------|-----------------------------------------------------------------|-------------------------|
| comp29447_c0 | 4       | 2455        | 184   | 36     |                              | 24                                | esterase FE4-like                                           | Y              | Dc               | Dc                                                  | Nv, Lh                                                          | [3, 11, 13, 14]         |
| comp36645_c0 | 0       | 9378        | 0     | 2      |                              | 5                                 | TSP14                                                       | Y              | Mc               | Mc                                                  |                                                                 | [12]                    |
| comp21395_c0 | 1       | 566         | 0     | 1      |                              | 2                                 | Chitooligosaccharidolytic beta-N-acetylglucosaminidase-like | Y              |                  | Ci                                                  | Eo, Lh                                                          | [1, 5, 15]              |
| comp17816_c0 | 0       | 1347        | 0     | 0      |                              | 7                                 | zinc metalloprotease-like protein                           | Y              |                  | Ci                                                  | Ep1, Nv, Hd, Ph, Lb, Lh                                         | [2, 3, 7, 9, 13, 15]    |
| comp34856_c1 | 2       | 759         | 0     | 1      |                              | 17                                | zinc metalloprotease, reprotolysin family                   | Y              |                  | Ci                                                  | Ep1, Nv, Hd, Ph, Lb, Lh                                         | [2, 3, 7, 9, 13, 15]    |
| comp37629_c0 | 0       | 663         | 0     | 0      |                              | 7                                 | zinc metalloprotease, reprotolysin family                   | Y              |                  | Ci                                                  | Ep1, Nv, Hd, Ph, Lb, Lh                                         | [2, 3, 7, 9, 13, 15]    |
| comp35200_c0 | 37      | 21281       | 1189  | 2      | 4                            | 18                                | zinc metalloprotease, reprotolysin family                   | Y              |                  | Ci                                                  | Ep1, Nv, Hd, Ph, Lb, Lh                                         | [2, 3, 7, 9, 13, 15]    |
| comp21557_c0 | 11      | 1952        | 17904 | 5      | 19                           | 19                                | zinc metalloprotease, reprotolysin family                   | Y              |                  | Ci                                                  | Ep1, Nv, Hd, Ph, Lb, Lh                                         | [2, 3, 7, 9, 13, 15]    |
| comp33950_c0 | 5       | 497         | 12638 | 5      | 8                            | 5                                 | metalloprotease-like, reprotolysin family                   | Y              | Ci               | Ci                                                  | Ep1, Nv, Hd, Ph, Lb, Lh                                         | [1, 2, 3, 7, 9, 13, 15] |
| comp35997_c1 | 0       | 502         | 15    | 1      |                              | 2                                 | lipase-like                                                 | N              |                  | Ci                                                  | Hd, Nv, Lb, Lh                                                  | [1-3, 13, 15]           |
| comp21535_c0 | 18      | 14846       | 0     | 0      |                              | 119                               | Ci-48a-like                                                 | Y              |                  | Ci                                                  |                                                                 | [1]                     |
| comp36923_c0 | 5       | 3374        | 0     | 0      |                              | 51                                | Ci-48a-like                                                 | Y              |                  | Ci                                                  |                                                                 | [1]                     |
| comp36974_c0 | 1       | 2338        | 0     | 0      |                              | 37                                | Ci-48a-like                                                 | Y              |                  | Ci                                                  |                                                                 | [1]                     |
| comp35388_c0 | 1       | 4535        | 0     | 1      |                              | 12                                | Ci-48a-like                                                 | Y              |                  | Ci                                                  |                                                                 | [1]                     |
| comp36283_c0 | 0       | 908         | 0     | 0      |                              | 31                                | Ci-48a-like                                                 | Y              |                  | Ci                                                  |                                                                 | [1]                     |
| comp38870_c0 | 0       | 279         | 0     | 1      |                              | 7                                 | Ci-48a-like                                                 | Y              |                  | Ci                                                  |                                                                 | [1]                     |
| comp35119_c0 | 1       | 400         | 10    | 389    |                              | 7                                 | Ci-48a-like, cytochrome P450-like                           | Y              |                  | Ci                                                  |                                                                 | [1]                     |
| comp37086_c0 | 1       | 1409        | 0     | 1      |                              | 4                                 | serine protease stubble-like                                | Y              |                  | Ci, Cr                                              | Nv, Pp2, Ph, Hd                                                 | [1-3, 6-8]              |
| comp36944_c0 | 0       | 1449        | 922   | 0      | 2                            | 4                                 | serine protease snake                                       | Y              |                  | Ci, Cr                                              | Nv, Pp2, Ph, Hd                                                 | [1-3, 6-8]              |

|              |    |       |     |      |    |                                                |   |  |        |            |             |
|--------------|----|-------|-----|------|----|------------------------------------------------|---|--|--------|------------|-------------|
| comp29745_c0 | 10 | 554   | 404 | 0    | 19 | Peptidase family M13 domain-containing protein | Y |  | Ma, Mh |            | [4]         |
| comp37301_c0 | 2  | 241   | 544 | 0    | 30 | Peptidase family M13 domain-containing protein | Y |  | Ma, Mh |            | [4]         |
| comp30169_c0 | 0  | 216   | 0   | 0    | 9  | 5NUC-like                                      | Y |  |        |            |             |
| comp38689_c0 | 1  | 103   | 2   | 29   | 22 | aminopeptidase N-like                          | Y |  |        |            |             |
| comp35353_c0 | 3  | 54643 | 0   | 1    | 4  | Antimicrobial peptide Hymenoptaecin HD-1       | Y |  |        |            |             |
| comp31735_c0 | 0  | 10016 | 0   | 0    | 2  | Antimicrobial peptide Hymenoptaecin HD-2       | Y |  |        |            |             |
| comp33946_c2 | 1  | 113   | 0   | 1    | 4  | phosphatidylinositol phospholipase C-like      | Y |  |        | Lb, Lh, Nv | [3, 13, 15] |
| comp36755_c0 | 9  | 5618  | 1   | 1    | 19 | phosphatidylinositol phospholipase C-like      | Y |  |        | Lb, Lh, Nv | [3, 13, 15] |
| comp37278_c0 | 0  | 931   | 0   | 8    | 2  | phosphatidylinositol phospholipase C-like      | Y |  |        | Lb, Lh, Nv | [3, 13, 15] |
| comp21629_c0 | 3  | 4115  | 0   | 1    | 5  | chemosensory protein-like                      | N |  |        |            |             |
| comp21599_c0 | 2  | 2220  | 0   | 0    | 16 | conserved uncharacterized protein              | Y |  |        |            |             |
| comp17486_c0 | 24 | 2198  | 1   | 1    | 24 | conserved uncharacterized protein              | Y |  |        |            |             |
| comp17509_c0 | 0  | 2035  | 0   | 0    | 11 | conserved uncharacterized protein              | N |  |        |            |             |
| comp17643_c0 | 2  | 3956  | 0   | 0    | 44 | conserved uncharacterized protein              | Y |  |        |            |             |
| comp17853_c0 | 0  | 1034  | 0   | 57   | 5  | conserved uncharacterized protein              | Y |  |        |            |             |
| comp21210_c0 | 0  | 412   | 0   | 0    | 14 | conserved uncharacterized protein              | N |  |        |            |             |
| comp21541_c0 | 0  | 4353  | 0   | 2    | 27 | conserved uncharacterized protein              | Y |  |        |            |             |
| comp33911_c0 | 2  | 3436  | 0   | 0    | 2  | conserved uncharacterized protein              | N |  |        |            |             |
| comp35377_c2 | 3  | 880   | 4   | 2    | 6  | conserved uncharacterized protein              | Y |  |        |            |             |
| comp36677_c0 | 0  | 1173  | 0   | 1292 | 2  | conserved uncharacterized protein              | Y |  |        |            |             |
| comp36794_c0 | 0  | 4090  | 0   | 0    | 11 | conserved uncharacterized protein              | Y |  |        |            |             |
| comp37014_c0 | 0  | 2027  | 0   | 0    | 3  | conserved uncharacterized protein              | Y |  |        |            |             |
| comp37136_c0 | 13 | 838   | 0   | 131  | 5  | conserved uncharacterized protein              | Y |  |        |            |             |
| comp30565_c1 | 1  | 1297  | 0   | 0    | 7  | flavin reductase-like                          | Y |  |        |            |             |

|              |    |       |        |    |    |    |                                                  |   |  |  |  |  |
|--------------|----|-------|--------|----|----|----|--------------------------------------------------|---|--|--|--|--|
| comp22698_c0 | 0  | 148   | 1      | 2  |    | 8  | flavin reductase-like                            | Y |  |  |  |  |
| comp17621_c0 | 0  | 9816  | 0      | 1  |    | 4  | MAGE-like                                        | Y |  |  |  |  |
| comp17572_c0 | 1  | 6080  | 0      | 4  |    | 4  | NPC2-like                                        | N |  |  |  |  |
| comp29569_c0 | 0  | 1245  | 0      | 0  |    | 3  | trypsin domain-containing protein                | Y |  |  |  |  |
| comp29658_c0 | 33 | 13629 | 117556 | 35 | 15 | 9  | unknown                                          | Y |  |  |  |  |
| comp36540_c1 | 0  | 83820 | 1      | 3  |    | 4  | unknown                                          | Y |  |  |  |  |
| comp21548_c0 | 0  | 14307 | 0      | 1  |    | 4  | unknown                                          | Y |  |  |  |  |
| comp29700_c0 | 0  | 538   | 0      | 0  |    | 3  | unknown                                          | N |  |  |  |  |
| comp21677_c0 | 0  | 490   | 0      | 0  |    | 2  | unknown                                          | N |  |  |  |  |
| comp36780_c0 | 0  | 6396  | 0      | 0  |    | 6  | unknown                                          | Y |  |  |  |  |
| comp36637_c0 | 0  | 8782  | 0      | 2  |    | 11 | unknown                                          | Y |  |  |  |  |
| comp35181_c3 | 0  | 4720  | 0      | 0  |    | 3  | unknown                                          | N |  |  |  |  |
| comp31906_c0 | 0  | 1778  | 0      | 0  |    | 32 | unknown                                          | N |  |  |  |  |
| comp21677_c2 | 0  | 745   | 0      | 0  |    | 6  | unknown                                          | Y |  |  |  |  |
| comp33009_c4 | 26 | 7326  | 3      | 2  |    | 8  | unknown                                          | Y |  |  |  |  |
| comp33250_c0 | 0  | 749   | 6      | 0  |    | 14 | unknown                                          | Y |  |  |  |  |
| comp21554_c0 | 1  | 6989  | 0      | 0  |    | 4  | unknown                                          | Y |  |  |  |  |
| comp17779_c0 | 3  | 8468  | 2      | 3  |    | 7  | unknown                                          | N |  |  |  |  |
| comp17801_c0 | 24 | 1428  | 0      | 0  |    | 4  | unknown                                          | Y |  |  |  |  |
| comp17803_c0 | 18 | 12314 | 2      | 3  |    | 14 | unknown                                          | Y |  |  |  |  |
| comp21210_c1 | 0  | 440   | 0      | 0  |    | 6  | unknown                                          | N |  |  |  |  |
| comp21624_c0 | 1  | 3835  | 0      | 0  |    | 3  | unknown                                          | Y |  |  |  |  |
| comp29847_c0 | 1  | 601   | 0      | 0  |    | 4  | unknown                                          | Y |  |  |  |  |
| comp37154_c0 | 7  | 1469  | 0      | 7  |    | 12 | unknown                                          | Y |  |  |  |  |
| comp37519_c0 | 0  | 438   | 0      | 0  |    | 5  | unknown                                          | Y |  |  |  |  |
| comp31919_c0 | 0  | 215   | 0      | 0  |    | 11 | Vascular endothelial growth factor receptor-like | Y |  |  |  |  |
| comp37158_c0 | 1  | 1398  | 0      | 0  |    | 11 | Vascular endothelial growth factor receptor-like | Y |  |  |  |  |
| comp29657_c0 | 1  | 9509  | 0      | 0  |    | 32 | viral A-type inclusion protein-like              | Y |  |  |  |  |
| comp40453_c0 | 0  | 167   | 0      | 0  |    | 24 | vitellogenin-like                                | Y |  |  |  |  |

Supplementary Table 4. Loci that are similarly expressed in teratocytes and ovaries (greater than 50 RPKM), and which have a corresponding protein product detected in teratocyte conditioned media. Products from these loci are most likely detected in teratocyte conditioned media because of low level teratocyte mortality during culture.

| Locus        | Ovaries | Teratocytes | Venom | Larvae | Venom unique peptide matches | Teratocyte unique peptide matches | Putative function                                | Signal peptide |
|--------------|---------|-------------|-------|--------|------------------------------|-----------------------------------|--------------------------------------------------|----------------|
| comp34313_c0 | 5658    | 6278        | 5237  | 5165   |                              | 4                                 | Ubiquitin-2 like Rad60 SUMO-like                 | N              |
| comp34092_c0 | 180     | 5044        | 1570  | 2      |                              | 2                                 | NPC2-like                                        | N              |
| comp21579_c0 | 1600    | 2752        | 417   | 4491   |                              | 4                                 | 40S ribosomal protein S3a                        | N              |
| comp36568_c0 | 3706    | 2619        | 570   | 7511   |                              | 25                                | elongation factor 1 alpha                        | N              |
| comp17592_c0 | 1082    | 2002        | 688   | 4068   |                              | 6                                 | 60S ribosomal protein L7                         | N              |
| comp17580_c0 | 1296    | 1739        | 370   | 4092   |                              | 2                                 | 40S ribosomal protein S6                         | Y              |
| comp36669_c0 | 1400    | 1694        | 543   | 3597   |                              | 6                                 | ribosomal protein S3                             | N              |
| comp36643_c0 | 1458    | 1673        | 375   | 3558   |                              | 5                                 | 60S ribosomal protein L4-like                    | Y              |
| comp36714_c0 | 1081    | 1613        | 508   | 4269   |                              | 4                                 | 60S ribosomal protein L7a                        | Y              |
| comp36702_c0 | 2095    | 1601        | 312   | 2814   |                              | 25                                | elongation factor 2                              | N              |
| comp36681_c0 | 1104    | 1596        | 688   | 3269   |                              | 2                                 | 60S ribosomal protein L10                        | N              |
| comp36672_c0 | 1099    | 1515        | 919   | 2871   |                              | 2                                 | ribosomal protein S15                            | N              |
| comp18742_c0 | 1479    | 1505        | 462   | 3235   |                              | 2                                 | 40S ribosomal protein S16                        | N              |
| comp36744_c0 | 927     | 1382        | 309   | 3078   |                              | 6                                 | 40S ribosomal protein S4                         | N              |
| comp36760_c0 | 522     | 1244        | 309   | 3098   |                              | 7                                 | 40S ribosomal protein SA                         | N              |
| comp36723_c0 | 1050    | 1198        | 735   | 2814   |                              | 2                                 | 40S ribosomal protein S17                        | Y              |
| comp36730_c0 | 1155    | 1174        | 358   | 2366   |                              | 3                                 | 40S ribosomal protein S13                        | N              |
| comp36575_c0 | 1376    | 1088        | 442   | 4264   |                              | 9                                 | 60S acidic ribosomal protein P0-like             | N              |
| comp36685_c0 | 3792    | 1037        | 236   | 2025   |                              | 2                                 | 60S ribosomal protein L13                        | N              |
| comp21544_c0 | 1006    | 1021        | 443   | 1919   |                              | 2                                 | 40S ribosomal protein S23                        | Y              |
| comp36752_c0 | 820     | 1021        | 518   | 2475   |                              | 3                                 | 40S ribosomal protein S14a                       | N              |
| comp36845_c0 | 801     | 998         | 362   | 1236   |                              | 27                                | heat shock 70 kDa protein-like                   | Y              |
| comp21529_c0 | 829     | 979         | 442   | 2057   |                              | 2                                 | 40S ribosomal protein S10                        | Y              |
| comp31782_c1 | 672     | 932         | 327   | 2316   |                              | 2                                 | 60S ribosomal protein L14-like                   | N              |
| comp36605_c0 | 1037    | 894         | 320   | 2239   |                              | 3                                 | 40S ribosomal protein S8                         | N              |
| comp21584_c0 | 773     | 856         | 273   | 2348   |                              | 3                                 | 60S ribosomal protein L5                         | N              |
| comp18427_c0 | 678     | 854         | 465   | 1850   |                              | 12                                | Calreticulin                                     | Y              |
| comp32278_c0 | 3834    | 837         | 1098  | 5059   |                              | 28                                | heat shock 70 kDa protein-like                   | Y              |
| comp36801_c0 | 809     | 806         | 319   | 1877   |                              | 2                                 | 40S ribosomal protein S20                        | N              |
| comp29667_c0 | 1104    | 784         | 288   | 1745   |                              | 2                                 | 40S ribosomal protein S18                        | N              |
| comp36949_c0 | 351     | 659         | 260   | 1055   |                              | 28                                | disulfide-isomerase A3-like                      | Y              |
| comp29645_c0 | 241     | 641         | 413   | 23     |                              | 2                                 | unknown                                          | N              |
| comp29635_c0 | 248     | 530         | 180   | 1056   |                              | 2                                 | SAGA-associated factor 29-like                   | N              |
| comp18494_c0 | 924     | 490         | 127   | 1906   |                              | 2                                 | eukaryotic translation initiation factor 5A-like | N              |
| comp36906_c0 | 436     | 414         | 196   | 1345   |                              | 4                                 | 60S ribosomal protein L12                        | Y              |

|               |      |     |     |      |  |    |                                               |   |
|---------------|------|-----|-----|------|--|----|-----------------------------------------------|---|
| comp29651_c0  | 1042 | 353 | 348 | 2130 |  | 7  | peptidyl-prolyl cis-trans isomerase-like      | N |
| comp36741_c0  | 332  | 350 | 198 | 871  |  | 2  | mitochondrial GTPase 1-like                   | N |
| comp17558_c0  | 345  | 340 | 241 | 967  |  | 26 | protein disulfide-isomerase-like              | N |
| comp21436_c0  | 514  | 334 | 153 | 367  |  | 2  | peptidyl-prolyl cis-trans isomerase B-like    | Y |
| comp17891_c0  | 449  | 317 | 254 | 1909 |  | 17 | Glyceraldehyde-3-phosphate dehydrogenase-like | N |
| comp34100_c2  | 1278 | 310 | 160 | 1898 |  | 19 | tubulin beta-1 chain-like                     | Y |
| comp36889_c0  | 474  | 292 | 70  | 1361 |  | 11 | Elongation factor 1-gamma                     | N |
| comp36956_c0  | 277  | 287 | 64  | 1932 |  | 4  | nucleoside diphosphate kinase-like            | N |
| comp29620_c0  | 249  | 286 | 169 | 285  |  | 8  | protein disulfide-isomerase A6-like           | Y |
| comp17599_c0  | 2262 | 246 | 158 | 2756 |  | 12 | actin related protein                         | N |
| comp20412_c0  | 167  | 237 | 100 | 376  |  | 26 | endoplasmic                                   | Y |
| comp17662_c0  | 1774 | 236 | 139 | 1643 |  | 14 | alpha-tubulin                                 | N |
| comp21625_c0  | 930  | 228 | 160 | 974  |  | 7  | 6-phosphofructokinase-like                    | Y |
| comp31722_c0  | 783  | 221 | 465 | 1243 |  | 2  | polyadenylate-binding protein 1-like          | N |
| comp31812_c1  | 388  | 198 | 34  | 345  |  | 4  | fatty acid synthase-like                      | Y |
| comp22551_c0  | 94   | 196 | 144 | 183  |  | 3  | C-factor-like                                 | Y |
| comp20922_c0  | 298  | 185 | 310 | 87   |  | 2  | conserved uncharacterized protein             | Y |
| comp37151_c0  | 383  | 183 | 106 | 703  |  | 2  | glutathione S-transferase S3                  | N |
| comp36792_c0  | 2094 | 181 | 149 | 1747 |  | 12 | heat shock 90 kDa protein-like                | Y |
| comp36043_c1  | 144  | 173 | 79  | 397  |  | 26 | Fructose-bisphosphate aldolase                | N |
| comp20947_c0  | 112  | 173 | 1   | 101  |  | 21 | L-lactate dehydrogenase-like                  | N |
| comp37049_c0  | 397  | 164 | 109 | 593  |  | 5  | Peroxiredoxin 1                               | N |
| comp21426_c1  | 295  | 161 | 102 | 406  |  | 2  | thioredoxin-like protein                      | N |
| comp17560_c0  | 385  | 152 | 96  | 1513 |  | 8  | ATP synthase beta subunit                     | N |
| comp36958_c0  | 371  | 135 | 56  | 1033 |  | 3  | ATP synthase alpha subunit                    | Y |
| comp18839_c0  | 224  | 135 | 146 | 172  |  | 6  | Cathepsin L                                   | Y |
| comp17797_c1  | 495  | 129 | 52  | 693  |  | 13 | heat shock 70 kDa protein-like                | N |
| comp31846_c0  | 541  | 127 | 65  | 964  |  | 4  | ATP-dependent RNA helicase WM6-like           | Y |
| comp30000_c1  | 293  | 127 | 60  | 314  |  | 17 | pyruvate kinase-like                          | Y |
| comp36998_c0  | 133  | 117 | 48  | 499  |  | 3  | syntenin-1-like                               | Y |
| comp21157_c1  | 457  | 116 | 73  | 1268 |  | 9  | conserved uncharacterized protein             | N |
| comp19329_c0  | 338  | 116 | 92  | 325  |  | 3  | farnesoic acid methyltransferase-like         | N |
| comp37675_c0  | 82   | 115 | 82  | 180  |  | 2  | chloride intracellular channel exc-4          | Y |
| comp29619_c0  | 228  | 112 | 63  | 271  |  | 17 | neutral alpha-glucosidase AB-like             | Y |
| comp21856_c1  | 206  | 102 | 28  | 618  |  | 23 | tudor staphylococcus/micrococcal nuclease     | Y |
| comp17797_c0  | 244  | 101 | 44  | 587  |  | 5  | heat shock 70 kDa protein-like                | N |
| comp36608_c0  | 622  | 99  | 136 | 797  |  | 2  | conserved uncharacterized protein             | Y |
| comp18352_c0  | 67   | 99  | 9   | 9    |  | 19 | aldehyde dehydrogenase X, mitochondrial-like  | Y |
| comp36093_c0  | 522  | 97  | 92  | 865  |  | 3  | Eukaryotic initiation factor 4A-II            | N |
| comp31602_c2  | 431  | 97  | 125 | 322  |  | 12 | transitional endoplasmic reticulum            | N |
| comp21759_c0  | 155  | 93  | 44  | 184  |  | 5  | asparaginyl-tRNA synthetase                   | N |
| comp37537_c0  | 169  | 92  | 57  | 246  |  | 11 | phosphoglycerate kinase-like                  | N |
| comp17666_c0  | 693  | 89  | 76  | 914  |  | 2  | RNA-binding protein squid-like                | N |
| comp33893_c8  | 946  | 88  | 99  | 486  |  | 4  | histone H3.3                                  | Y |
| comp35264_c12 | 155  | 85  | 54  | 186  |  | 2  | protein transport protein Sec23A-like         | Y |
| comp29648_c0  | 531  | 82  | 47  | 901  |  | 2  | nucleosome assembly protein 1-like            | N |



|               |     |    |     |      |  |    |                                                           |   |
|---------------|-----|----|-----|------|--|----|-----------------------------------------------------------|---|
| comp37182_c0  | 252 | 76 | 264 | 75   |  | 2  | cathepsin L-like                                          | Y |
| comp35274_c2  | 156 | 75 | 61  | 452  |  | 10 | Malate dehydrogenase, mitochondrial                       | N |
| comp18235_c0  | 221 | 71 | 23  | 220  |  | 4  | ATP-citrate synthase-like                                 | N |
| comp37489_c0  | 155 | 70 | 24  | 246  |  | 5  | 6-phosphogluconate dehydrogenase, decarboxylating-like    | N |
| comp37473_c0  | 118 | 70 | 18  | 271  |  | 26 | glucose-6-phosphate isomerase                             | Y |
| comp21596_c2  | 222 | 69 | 21  | 612  |  | 7  | La autoantigen homolog (ssb gene)                         | N |
| comp31773_c1  | 147 | 69 | 37  | 153  |  | 3  | glucosidase 2 subunit beta-like                           | Y |
| comp29595_c0  | 120 | 69 | 45  | 240  |  | 2  | annexin-B9-like                                           | Y |
| comp37055_c1  | 328 | 67 | 66  | 620  |  | 14 | enolase-like                                              | Y |
| comp29617_c2  | 68  | 67 | 45  | 53   |  | 7  | hexokinase type 2-like                                    | N |
| comp35103_c6  | 375 | 66 | 101 | 239  |  | 2  | moesin/ezrin/radixin-like                                 | Y |
| comp35427_c12 | 242 | 64 | 54  | 204  |  | 2  | SDA1-like protein                                         | Y |
| comp30297_c0  | 96  | 64 | 32  | 104  |  | 13 | Hypoxia up-regulated protein-like                         | Y |
| comp39545_c0  | 59  | 64 | 22  | 105  |  | 5  | Asparagine synthetase                                     | N |
| comp38174_c0  | 82  | 63 | 62  | 171  |  | 2  | coatamer subunit delta-like                               | Y |
| comp36141_c1  | 51  | 63 | 1   | 33   |  | 8  | histone H2B-like protein                                  | Y |
| comp22309_c3  | 168 | 61 | 36  | 449  |  | 2  | eukaryotic translation initiation factor 2 subunit 1-like | Y |
| comp29812_c1  | 293 | 60 | 23  | 293  |  | 5  | eukaryotic translation initiation factor 3 subunit A-like | Y |
| comp21640_c0  | 636 | 59 | 40  | 1442 |  | 4  | nascent polypeptide-associated complex subunit            | N |
| comp37144_c0  | 350 | 54 | 40  | 731  |  | 7  | T-complex protein 1 subunit epsilon                       | N |
| comp17761_c0  | 299 | 54 | 29  | 216  |  | 5  | citrate synthase, mitochondrial-like                      | Y |
| comp20381_c0  | 363 | 53 | 40  | 506  |  | 10 | T-complex protein 1 subunit gamma                         | N |
| comp37518_c0  | 232 | 52 | 37  | 414  |  | 14 | T-complex protein 1 subunit eta                           | N |
| comp21888_c0  | 266 | 51 | 75  | 216  |  | 15 | thioredoxin reductase 2, mitochondrial-like               | Y |
| comp35886_c6  | 157 | 51 | 39  | 117  |  | 17 | puromycin-sensitive aminopeptidase-like                   | Y |
| comp36402_c2  | 65  | 51 | 5   | 169  |  | 9  | inositol-3-phosphate synthase 1-B-like                    | Y |

Supplementary Table 5. Loci that have a corresponding protein product detected in teratocyte conditioned media, that do not belong to the differentially upregulated or similarly expressed groups in a pairwise teratocyte and ovaries comparison. These loci have low teratocyte RPKM values and low fold change values relative to ovaries, suggesting that they do not encode secretory products. Products from these loci are most likely detected in teratocyte conditioned media because of low level teratocyte mortality during culture.

| Locus         | Ovaries | Teratocytes | Venom | Larvae | Venom unique peptide matches | Teratocyte unique peptide matches | Putative function                                | Signal peptide |
|---------------|---------|-------------|-------|--------|------------------------------|-----------------------------------|--------------------------------------------------|----------------|
| comp38335_c0  | 18      | 340         | 24    | 2      |                              | 19                                | membrane metallo-endopeptidase-like              | N              |
| comp29445_c1  | 13      | 192         | 14    | 10     |                              | 6                                 | neural/ectodermal development factor IMP-L2-like | Y              |
| comp31811_c0  | 30      | 153         | 15    | 1      |                              | 10                                | unknown                                          | Y              |
| comp35146_c2  | 41      | 111         | 19    | 100    |                              | 6                                 | histone-like                                     | Y              |
| comp40745_c0  | 5       | 107         | 0     | 2      |                              | 2                                 | unknown                                          | Y              |
| comp39677_c0  | 23      | 92          | 23    | 13     |                              | 4                                 | endoplasmic reticulum oxidoreductin-1-like       | Y              |
| comp36269_c3  | 30      | 57          | 22    | 27     |                              | 3                                 | gamma-glutamyl hydrolase A-like                  | Y              |
| comp34347_c0  | 100     | 49          | 53    | 133    |                              | 3                                 | protein transport protein Sec24C-like            | Y              |
| comp34541_c0  | 282     | 48          | 26    | 462    |                              | 13                                | T-complex protein 1 subunit theta-like           | N              |
| comp38669_c0  | 54      | 47          | 46    | 81     |                              | 3                                 | venom serine carboxypeptidase-like               | Y              |
| comp40703_c0  | 1       | 46          | 59    | 8      | 2                            | 2                                 | esterase/lipase-like, Ci-50                      | Y              |
| comp37647_c0  | 173     | 44          | 45    | 322    |                              | 4                                 | translation initiation factor 2 gamma subunit    | N              |
| comp38007_c0  | 121     | 43          | 37    | 319    |                              | 6                                 | Dihydrolipoyl dehydrogenase, mitochondrial       | Y              |
| comp35378_c7  | 97      | 42          | 31    | 104    |                              | 2                                 | acetyl-CoA acetyltransferase, cytosolic-like     | Y              |
| comp29391_c0  | 139     | 42          | 26    | 142    |                              | 2                                 | dipeptidyl peptidase 3-like                      | Y              |
| comp36094_c0  | 30      | 41          | 2     | 26     |                              | 5                                 | unknown                                          |                |
| comp37698_c0  | 225     | 40          | 22    | 349    |                              | 8                                 | T-complex protein 1 subunit zeta-like            | N              |
| comp35596_c10 | 173     | 40          | 2     | 61     |                              | 11                                | Insulin-like growth factor-like                  | N              |
| comp29837_c0  | 374     | 39          | 25    | 214    |                              | 5                                 | 97 kDa heat shock protein-like                   | Y              |
| comp29837_c2  | 398     | 38          | 21    | 189    |                              | 8                                 | heat shock 70 kDa protein 4L-like                | N              |
| comp38080_c0  | 124     | 37          | 44    | 249    |                              | 3                                 | proteasome subunit alpha type-4-like             | N              |
| comp37760_c0  | 159     | 37          | 30    | 162    |                              | 5                                 | Isocitrate dehydrogenase [NADP] cytoplasmic      | N              |
| comp30773_c0  | 190     | 35          | 36    | 183    |                              | 4                                 | Phosphoglycerate mutase-like                     | Y              |
| comp21723_c0  | 125     | 35          | 49    | 178    |                              | 7                                 | V-type proton ATPase subunit B-like              | N              |
| comp20153_c0  | 251     | 35          | 47    | 378    |                              | 11                                | triosephosphate isomerase-like                   | N              |
| comp37002_c0  | 1379    | 33          | 9     | 329    |                              | 6                                 | heat shock protein 83-like                       | N              |
| comp20709_c0  | 298     | 33          | 66    | 306    |                              | 10                                | V-type proton ATPase catalytic subunit A-like    | N              |
| comp37851_c0  | 129     | 32          | 59    | 262    |                              | 2                                 | Proteasome subunit alpha type-5                  | Y              |
| comp20425_c0  | 215     | 32          | 21    | 359    |                              | 7                                 | T-complex protein 1 subunit alpha-like           | N              |
| comp32652_c1  | 81      | 32          | 19    | 98     |                              | 9                                 | Histidyl-tRNA synthetase, cytoplasmic            | N              |
| comp34190_c1  | 87      | 30          | 49    | 417    |                              | 2                                 | cytoplasmic aconitate hydratase-like             | Y              |

|              |     |    |     |      |  |    |                                                      |   |
|--------------|-----|----|-----|------|--|----|------------------------------------------------------|---|
| comp21730_c0 | 156 | 30 | 44  | 250  |  | 2  | transaldolase-like                                   | N |
| comp29800_c0 | 290 | 30 | 33  | 150  |  | 3  | Ubiquitin-like modifier-activating enzyme            | N |
| comp36460_c1 | 63  | 30 | 9   | 70   |  | 4  | isoleucine--tRNA ligase                              | Y |
| comp21803_c0 | 186 | 30 | 25  | 214  |  | 10 | e3 ubiquitin-protein ligase RWD2-like                | Y |
| comp19665_c0 | 242 | 30 | 26  | 432  |  | 14 | T-complex protein 1 subunit delta                    | Y |
| comp17397_c0 | 171 | 28 | 25  | 84   |  | 3  | spectrin alpha chain-like                            | Y |
| comp40186_c0 | 46  | 27 | 29  | 36   |  | 6  | unknown                                              |   |
| comp21801_c0 | 114 | 27 | 47  | 82   |  | 2  | cytosolic non-specific dipeptidase-like              | Y |
| comp21667_c0 | 147 | 27 | 20  | 145  |  | 2  | 26S proteasome non-ATPase regulatory subunit 12-like | Y |
| comp21118_c0 | 67  | 25 | 33  | 63   |  | 4  | programmed cell death 6-interacting protein-like     | Y |
| comp28412_c1 | 44  | 24 | 19  | 39   |  | 2  | unknown                                              |   |
| comp32131_c0 | 114 | 24 | 21  | 134  |  | 4  | ubiquitin carboxyl-terminal hydrolase 14-like        | N |
| comp29417_c0 | 43  | 23 | 8   | 107  |  | 2  | Aspartate aminotransferase, cytoplasmic              | N |
| comp20156_c0 | 103 | 23 | 16  | 78   |  | 2  | leucyl-tRNA synthetase, cytoplasmic-lik              | Y |
| comp22761_c0 | 96  | 23 | 52  | 160  |  | 20 | unknown                                              | Y |
| comp22243_c0 | 30  | 22 | 11  | 74   |  | 5  | Adenosine kinase                                     | N |
| comp37680_c0 | 156 | 21 | 24  | 157  |  | 2  | 26S proteasome non-ATPase regulatory subunit 1-like  | Y |
| comp21206_c0 | 164 | 20 | 6   | 121  |  | 2  | importin subunit beta-1-like                         | Y |
| comp36989_c0 | 365 | 20 | 8   | 1265 |  | 18 | 60 kDa heat shock protein, mitochondrial             | Y |
| comp19857_c0 | 103 | 18 | 14  | 224  |  | 2  | 3-hydroxyacyl-CoA dehydrogenase                      | N |
| comp38578_c0 | 84  | 17 | 32  | 141  |  | 3  | 26S proteasome non-ATPase regulatory subunit 3-like  | N |
| comp38339_c0 | 166 | 17 | 23  | 100  |  | 3  | bifunctional aminoacyl-tRNA synthetase-like          | Y |
| comp17700_c0 | 182 | 17 | 12  | 775  |  | 16 | transketolase-like protein                           | Y |
| comp37879_c0 | 136 | 16 | 17  | 268  |  | 12 | T-complex protein 1 subunit beta-like                | N |
| comp38172_c0 | 128 | 15 | 15  | 83   |  | 3  | cullin-associated NEDD8-dissociated protein          | N |
| comp34165_c0 | 209 | 15 | 8   | 229  |  | 4  | heterogeneous nuclear ribonucleoprotein              | Y |
| comp19472_c0 | 34  | 13 | 11  | 46   |  | 2  | unknown                                              |   |
| comp18768_c0 | 75  | 11 | 22  | 67   |  | 22 | NADP-dependent malic enzyme-like                     | N |
| comp29304_c0 | 83  | 8  | 4   | 138  |  | 2  | uridine 5'-monophosphate synthase-like               | N |
| comp21462_c1 | 332 | 8  | 5   | 95   |  | 3  | piwi-like                                            | Y |
| comp21743_c0 | 72  | 6  | 87  | 51   |  | 3  | Translational activator GCN1                         | Y |
| comp38771_c0 | 52  | 4  | 24  | 187  |  | 9  | cystathionine beta-synthase-like                     | N |
| comp22875_c0 | 69  | 3  | 61  | 112  |  | 2  | Antithrombin-III                                     | Y |
| comp31759_c3 | 18  | 3  | 17  | 108  |  | 3  | adenylosuccinate lyase-like                          | N |
| comp38123_c0 | 4   | 1  | 1   | 408  |  | 3  | conserved uncharacterized protein                    | Y |
| comp22689_c1 | 110 | 1  | 18  | 100  |  | 6  | conserved uncharacterized protein                    | N |
| comp31654_c1 | 20  | 1  | 290 | 233  |  | 7  | conserved uncharacterized protein                    | Y |
| comp22459_c0 | 10  | 0  | 297 | 70   |  | 2  | venom protein Vn50-like                              | Y |
| comp38046_c0 | 7   | 0  | 3   | 288  |  | 2  | apolipoporphins-like                                 | Y |
| comp35347_c6 | 139 | 0  | 68  | 477  |  | 6  | chitinase                                            | Y |

Supplementary Table 6. Loci with RPKM greater than 50 and differentially upregulated greater than 50-fold in larvae compared to ovaries. No proteins were detected in larval conditioned media, suggesting that these loci are not secretory products.

| Locus        | Ovaries | Teratocytes | Venom | Larvae | Venom unique peptide matches | Teratocyte unique peptide matches | Putative function                           | Signal peptide |
|--------------|---------|-------------|-------|--------|------------------------------|-----------------------------------|---------------------------------------------|----------------|
| comp27562_c0 | 0.1     | 0           | 0     | 106    |                              |                                   | Annexin-B9-like                             | Y              |
| comp37746_c0 | 0.1     | 0           | 0     | 403    |                              |                                   | apolipoprotein D-like                       | Y              |
| comp38433_c0 | 0.1     | 222         | 1     | 87     |                              |                                   | apolipoprotein D-like                       | Y              |
| comp17852_c0 | 15      | 0           | 1     | 1064   |                              |                                   | apolipoprotein D-like                       | N              |
| comp36851_c0 | 5       | 0           | 24    | 2255   |                              |                                   | B1 protein-like                             | Y              |
| comp16179_c0 | 0.1     | 0           | 0     | 157    |                              |                                   | carboxypeptidase B-like                     | Y              |
| comp21690_c1 | 3       | 0           | 1     | 155    |                              |                                   | carboxypeptidase B-like                     | Y              |
| comp18591_c0 | 5       | 0           | 597   | 389    |                              |                                   | Chemosensory protein, Ci-14a                | Y              |
| comp35119_c0 | 1       | 400         | 10    | 389    |                              | 7                                 | Ci-48a-like, cytochrome P450-like           | Y              |
| comp36677_c0 | 0.1     | 1173        | 0     | 1292   |                              | 2                                 | conserved uncharacterized protein           | Y              |
| comp20551_c0 | 0.1     | 0           | 0     | 1104   |                              |                                   | conserved uncharacterized protein           | Y              |
| comp30268_c0 | 0.1     | 0           | 0     | 604    |                              |                                   | conserved uncharacterized protein           | Y              |
| comp38288_c0 | 0.1     | 0           | 0     | 465    |                              |                                   | conserved uncharacterized protein           | Y              |
| comp19237_c0 | 0.1     | 0           | 0     | 306    |                              |                                   | conserved uncharacterized protein           | Y              |
| comp18727_c0 | 0.1     | 0           | 0     | 303    |                              |                                   | conserved uncharacterized protein           | Y              |
| comp37169_c0 | 1       | 0           | 0     | 1094   |                              |                                   | conserved uncharacterized protein           | Y              |
| comp42762_c0 | 0.1     | 0           | 0     | 103    |                              |                                   | conserved uncharacterized protein           | N              |
| comp34270_c1 | 0.1     | 12          | 0     | 87     |                              |                                   | conserved uncharacterized protein           | N              |
| comp17853_c0 | 0.1     | 1034        | 0     | 57     |                              | 5                                 | conserved uncharacterized protein           | Y              |
| comp29466_c0 | 1       | 0           | 0     | 279    |                              |                                   | conserved uncharacterized protein           | Y              |
| comp35060_c0 | 1       | 0           | 0     | 231    |                              |                                   | conserved uncharacterized protein           | Y              |
| comp17284_c0 | 2       | 39          | 0     | 281    |                              |                                   | conserved uncharacterized protein           | Y              |
| comp22684_c1 | 3       | 0           | 0     | 272    |                              |                                   | conserved uncharacterized protein           | Y              |
| comp16315_c0 | 1       | 0           | 29    | 64     |                              |                                   | conserved uncharacterized protein           | Y              |
| comp38404_c0 | 0.1     | 0           | 1     | 372    |                              |                                   | cuticle protein-like                        | Y              |
| comp38051_c0 | 0.1     | 0           | 0     | 354    |                              |                                   | cuticle protein-like                        | Y              |
| comp34221_c0 | 0.1     | 0           | 0     | 302    |                              |                                   | cuticle protein-like                        | Y              |
| comp18319_c0 | 0.1     | 0           | 0     | 167    |                              |                                   | cuticle protein-like                        | N              |
| comp40683_c0 | 0.1     | 0           | 0     | 116    |                              |                                   | cuticle protein-like                        | Y              |
| comp22841_c0 | 0.1     | 0           | 0     | 98     |                              |                                   | cuticle protein-like                        | N              |
| comp42237_c0 | 0.1     | 1           | 2     | 96     |                              |                                   | cuticle protein-like                        | N              |
| comp39420_c0 | 0.1     | 0           | 87    | 92     |                              |                                   | cuticle protein-like                        | Y              |
| comp16287_c0 | 1       | 0           | 0     | 159    |                              |                                   | cuticle protein-like                        | Y              |
| comp38084_c0 | 0.1     | 99          | 0     | 290    |                              |                                   | egf-like                                    | N              |
| comp22721_c0 | 0.1     | 0           | 0     | 617    |                              |                                   | Endocuticle structural glycoprotein SgAbd-1 | Y              |
| comp37936_c0 | 0.1     | 0           | 1     | 428    |                              |                                   | Endocuticle structural glycoprotein SgAbd-1 | Y              |
| comp31666_c2 | 1       | 0           | 1     | 2142   |                              |                                   | Endocuticle structural glycoprotein SgAbd-1 | Y              |

|              |     |     |    |      |   |                                  |   |
|--------------|-----|-----|----|------|---|----------------------------------|---|
| comp36399_c0 | 2   | 0   | 0  | 301  |   | fatty acid synthase-like         | Y |
| comp37362_c0 | 2   | 1   | 1  | 724  |   | Fatty acid-binding protein-like  | N |
| comp18559_c0 | 0.1 | 0   | 1  | 4105 |   | hexamerin                        | N |
| comp36892_c0 | 1   | 0   | 1  | 3958 |   | hexamerin                        | Y |
| comp29446_c0 | 1   | 0   | 0  | 297  |   | hexamerin                        | Y |
| comp19037_c0 | 9   | 0   | 0  | 555  |   | hexamerin                        | Y |
| comp29574_c0 | 0.1 | 0   | 0  | 882  |   | hypothetical protein             | N |
| comp18539_c0 | 0.1 | 0   | 0  | 728  |   | hypothetical protein             | Y |
| comp37716_c0 | 0.1 | 0   | 0  | 710  |   | hypothetical protein             | Y |
| comp37603_c0 | 0.1 | 0   | 0  | 584  |   | hypothetical protein             | Y |
| comp37454_c0 | 0.1 | 0   | 0  | 570  |   | hypothetical protein             | N |
| comp37840_c0 | 0.1 | 0   | 0  | 406  |   | hypothetical protein             | N |
| comp31666_c1 | 0.1 | 0   | 0  | 260  |   | hypothetical protein             | N |
| comp19005_c0 | 0.1 | 0   | 0  | 205  |   | hypothetical protein             | Y |
| comp23029_c0 | 0.1 | 0   | 0  | 203  |   | hypothetical protein             | Y |
| comp22937_c0 | 0.1 | 0   | 0  | 182  |   | hypothetical protein             | Y |
| comp21665_c0 | 0.1 | 0   | 0  | 167  |   | hypothetical protein             | N |
| comp18319_c1 | 0.1 | 0   | 0  | 143  |   | hypothetical protein             | N |
| comp38086_c0 | 0.1 | 62  | 0  | 135  |   | hypothetical protein             | N |
| comp22956_c0 | 0.1 | 0   | 0  | 132  |   | hypothetical protein             | Y |
| comp40819_c0 | 0.1 | 0   | 0  | 128  |   | hypothetical protein             | Y |
| comp41282_c0 | 0.1 | 1   | 0  | 127  |   | hypothetical protein             | Y |
| comp22956_c1 | 0.1 | 0   | 0  | 122  |   | hypothetical protein             | N |
| comp41083_c0 | 0.1 | 0   | 0  | 97   |   | hypothetical protein             | Y |
| comp37474_c0 | 1   | 0   | 0  | 701  |   | hypothetical protein             | Y |
| comp17718_c0 | 1   | 206 | 1  | 633  |   | hypothetical protein             | Y |
| comp34190_c0 | 1   | 0   | 0  | 259  |   | hypothetical protein             | N |
| comp39376_c0 | 1   | 0   | 0  | 221  |   | hypothetical protein             | Y |
| comp37818_c0 | 2   | 0   | 1  | 404  |   | hypothetical protein             | Y |
| comp33398_c0 | 1   | 1   | 0  | 188  |   | hypothetical protein             | Y |
| comp39794_c0 | 1   | 1   | 23 | 163  |   | hypothetical protein             | Y |
| comp40372_c0 | 1   | 0   | 0  | 136  |   | hypothetical protein             | N |
| comp37546_c0 | 2   | 1   | 0  | 269  |   | hypothetical protein             | Y |
| comp37903_c0 | 5   | 0   | 0  | 511  |   | hypothetical protein             | Y |
| comp38123_c0 | 4   | 1   | 1  | 408  | 3 | hypothetical protein             | Y |
| comp34034_c0 | 1   | 0   | 0  | 99   |   | hypothetical protein             | Y |
| comp37781_c0 | 3   | 0   | 33 | 247  |   | hypothetical protein             | Y |
| comp34190_c2 | 7   | 0   | 0  | 562  |   | hypothetical protein             | Y |
| comp22918_c1 | 4   | 0   | 2  | 303  |   | hypothetical protein             | N |
| comp18648_c0 | 3   | 1   | 1  | 188  |   | hypothetical protein             | N |
| comp40523_c0 | 0.1 | 0   | 0  | 141  |   | metalloprotease-like             | Y |
| comp19031_c0 | 2   | 41  | 0  | 161  |   | Monocarboxylate transporter-like | N |
| comp37854_c0 | 0.1 | 0   | 0  | 421  |   | Peritrophin-1-like               | Y |
| comp18994_c0 | 0.1 | 0   | 0  | 481  |   | putative mucin-like protein      | N |
| comp19348_c0 | 0.1 | 0   | 0  | 397  |   | putative mucin-like protein      | Y |
| comp22425_c0 | 2   | 0   | 1  | 179  |   | Serine proteinase stubble-like   | Y |

|              |     |     |     |     |  |  |                                                                     |   |
|--------------|-----|-----|-----|-----|--|--|---------------------------------------------------------------------|---|
| comp18480_c0 | 2   | 0   | 1   | 152 |  |  | Short/branched chain specific acyl-CoA dehydrogenase, mitochondrial | Y |
| comp37382_c0 | 2   | 353 | 136 | 114 |  |  | Thioredoxin                                                         | Y |
| comp40598_c0 | 0.1 | 0   | 0   | 148 |  |  | vitellin-degrading protease-like                                    | Y |

Supplementary Table 7. Nudivirus-like genes detected in the venom, teratocyte, ovary and larval transcriptome dataset. Several nudivirus-like genes were not detected in the transcriptome dataset, from which low abundance loci had been removed. For nudivirus-like genes represented in the dataset, no expression was observed (RPKM < 3) in teratocytes, venom or larval samples, with the exception of *pif-5*.

| Locus name in transcriptome | Ovaries RPKM | Teratocytes RPKM | Venom RPKM  | Larvae RPKM | Nudivirus-like gene        | Accession number |
|-----------------------------|--------------|------------------|-------------|-------------|----------------------------|------------------|
| comp36928_c0                | 1995         | 0                | 1           | 0           | 17a                        | JR139426         |
| comp17471_c0                | 213          | 0                | 0           | 0           | 27b-like                   | JO935730         |
| comp35907_c0                | 306          | 0                | 0           | 0           | 35a                        | JO965152         |
| comp35095_c5                | 210          | 1                | 1           | 3           | 35a                        | JO967015         |
| comp35095_c6                | 165          | 0                | 0           | 0           | 35a                        | JO967014         |
| comp23093_c0                | 284          | 0                | 0           | 0           | 35a                        | JO957783         |
| comp38425_c0                | 167          | 0                | 0           | 0           | 35a                        | JO951116         |
| comp22772_c0                | 240          | 1                | 1           | 2           | 35a                        | JO941132         |
| comp35095_c5                | 210          | 1                | 1           | 3           | 35a                        | JO967015         |
| comp33171_c0                | 238          | 0                | 0           | 0           | 35a                        | JO915239         |
| comp22099_c0                | 124          | 0                | 0           | 0           | 35a                        | JO957609         |
| comp35095_c5                | 210          | 1                | 1           | 3           | 35a                        | JO967015         |
| comp29688_c1                | 762          | 0                | 0           | 0           | 38K                        | JO947012         |
| comp38381_c0                | 158          | 0                | 0           | 0           | ac92-like-1                | JO941840         |
| comp37183_c0                | 537          | 0                | 0           | 0           | HzNVorf106-like            | JO948842         |
| comp22792_c1                | 180          | 0                | 0           | 0           | HzNVorf118-like (PmV-like) | JO972194         |
| comp22792_c0                | 297          | 0                | 0           | 0           | HzNVorf118-like (PmV-like) | JO972194         |
| comp35354_c0                | 183          | 2                | 1           | 1           | HzNVorf128-like            | JO979913         |
| comp36966_c0                | 1020         | 0                | 0           | 0           | HzNVorf64-like (p51)       | JO913493         |
| comp21596_c1                | 1008         | 0                | 0           | 0           | HzNVorf9-like 1            | JO913494         |
| comp21596_c0                | 232          | 0                | 0           | 0           | HzNVorf9-like 1            | JO913494         |
| comp20060_c0                | 464          | 0                | 0           | 0           | HzNVorf9-like 2            | JO913495         |
| comp22897_c0                | 110          | 0                | 0           | 0           | 30b                        | JO919922         |
| comp35642_c1                | 138          | 0                | 0           | 0           | lef-5                      | JO963952         |
| comp35354_c0                | 183          | 2                | 1           | 1           | lef-8                      | JO979913         |
| comp17941_c0                | 147          | 0                | 0           | 0           | odv-e66                    | JO941547         |
| comp21307_c0                | 325          | 0                | 0           | 0           | odv-e66                    | JO954076         |
| comp21804_c0                | 352          | 0                | 0           | 0           | odv-e66                    | JO928249         |
| comp22420_c0                | 794          | 0                | 0           | 0           | odv-e66                    | JO943687         |
| comp29934_c0                | 255          | 0                | 0           | 0           | odv-e66                    | JO960812         |
| comp31454_c0                | 1170         | 0                | 1           | 0           | odv-e66                    | JO940281         |
| comp34506_c0                | 976          | 0                | 0           | 0           | odv-e66                    | JO933415         |
| comp34506_c0                | 976          | 0                | 0           | 0           | odv-e66                    | JO933415         |
| comp34757_c0                | 117          | 0                | 0           | 0           | odv-e66                    | JO916892         |
| comp36214_c0                | 384          | 0                | 0           | 0           | odv-e66                    | JO951907         |
| comp36214_c1                | 1503         | 0                | 0           | 0           | odv-e66                    | JO921937         |
| comp36214_c2                | 796          | 0                | 1           | 0           | odv-e66                    | JO978990         |
| comp37041_c0                | 1756         | 0                | 1           | 0           | odv-e66                    | JO974925         |
| comp37264_c0                | 276          | 0                | 0           | 0           | odv-e66                    | JO929681         |
| comp38624_c0                | 282          | 0                | 0           | 0           | odv-e66                    | JO944999         |
| comp39237_c0                | 188          | 0                | 0           | 0           | odv-e66                    | JO955987         |
| comp40103_c0                | 129          | 0                | 0           | 0           | odv-e66                    | JO936339         |
| comp17101_c0                | 308          | 0                | 0           | 0           | p47                        | JO979914         |
| comp17155_c0                | 349          | 0                | 0           | 0           | p74                        | JO979915         |
| comp18516_c0                | 258          | 0                | 0           | 0           | pif-1                      | JO979916         |
| comp19798_c1                | 258          | 0                | 0           | 0           | pif-2                      | JO935365         |
| comp37728_c0                | 184          | 0                | 0           | 0           | pif-3                      | JO972553         |
| comp17377_c0                | 284          | 0                | 0           | 0           | pif-4                      | JO913492         |
| comp17357_c0                | 214          | 0                | 0           | 0           | pif-5                      | JO915573         |
| <b>comp36349_c0</b>         | <b>472</b>   | <b>3</b>         | <b>1020</b> | <b>1</b>    | <b>pif-5</b>               | <b>JO923318</b>  |

|              |      |   |   |   |                 |          |
|--------------|------|---|---|---|-----------------|----------|
| comp35642_c1 | 138  | 0 | 0 | 0 | <i>vlf-1</i>    | JO963952 |
| comp37375_c0 | 374  | 0 | 0 | 0 | <i>vlf-1b-2</i> | JO944220 |
| comp17495_c0 | 2592 | 0 | 2 | 0 | <i>vp39</i>     | JR139430 |



Supplementary Table 8. Matches to MdBV proteins in the venom, teratocyte, ovary and larval transcriptome dataset. Prior studies have shown that most MdBV genes are expressed at zero or low levels in wasps, and consistent with this, most MdBV protein queries had no match in the transcriptome dataset, from which low abundance loci had been removed. Only one MdBV gene was identified in the transcriptome dataset (*egf0.4*), plus several putative MdBV gene relatives located elsewhere in the *M. demolitor* genome. Each locus with a match to an MdBV protein is listed with RPKM values for expression and its best MdBV match. BLAST of MdBV matches against the NCBI non-redundant database (nr) identified three loci (comp36989\_c1, comp30193\_c0 and comp32277\_c5) as more similar to homologs in other hymenopteran species than to MdBV genes, suggesting they are of insect rather than viral origin.

| Locus               | Ovaries RPKM | Teratocytes RPKM | Venom RPKM | Larvae RPKM | MdBV relative        | Accession                          | BLAST % identity        | Best nr BLAST hit                                                                    |
|---------------------|--------------|------------------|------------|-------------|----------------------|------------------------------------|-------------------------|--------------------------------------------------------------------------------------|
| comp35738_c4        | 111          | 24               | 17         | 50          | <i>egf0.4</i>        | YP_239420.1<br>YP_239417.1         | 102/103<br>(99%)        | Egf0.4                                                                               |
| <b>comp38084_c0</b> | <b>0</b>     | <b>99</b>        | <b>0</b>   | <b>290</b>  | <b><i>egf1.0</i></b> | <b>YP_239421.1</b>                 | <b>44/107<br/>(41%)</b> | <b>Egf1.5</b>                                                                        |
|                     |              |                  |            |             | <b><i>egf1.5</i></b> | <b>YP_239418.1<br/>YP_239416.1</b> | <b>45/107<br/>(42%)</b> |                                                                                      |
| comp36989_c1        | 86           | 6                | 7          | 22          | <i>ptp-H1</i>        | YP_239381.1                        | 70/268<br>(26%)         | PTP corkscrew-like ( <i>Megachile rotundata</i> ) 542/618 (88%)                      |
| comp30193_c0        | 57           | 14               | 9          | 54          | <i>ptp-H3</i>        | YP_239383.1                        | 92/269<br>(34%)         | Putative PTP non-receptor type 61F-like ( <i>Nasonia vitripennis</i> ) 318/456 (70%) |
| comp32277_c5        | 42           | 555              | 22         | 22          | <i>ank-G3</i>        | YP_239379.1                        | 28/93<br>(30%)          | NF-kappa-B transcription factor relish ( <i>Bombus terrestris</i> ) 412/804 (51%)    |
|                     |              |                  |            |             | <i>ank-C1</i>        | YP_239368.1                        | 28/91<br>(30%)          |                                                                                      |
|                     |              |                  |            |             | <i>ank-C2</i>        | YP_239369.1                        | 27/82<br>(32%)          |                                                                                      |

Supplementary Figure 1. SDS-PAGE analysis of proteins in larva-conditioned media. Lanes 1 and 5: PageRuler Plus Prestained marker, lane 2: teratocyte-conditioned media, lane 3: protein from whole larvae, lane 4: larva-conditioned media. Teratocyte and larva-conditioned media were derived using the methods described in the results, by incubation in media for 72 hours. The gel was loaded with equivalent amounts of conditioned media, and stained with InstantBlue Coomassie-based stain.

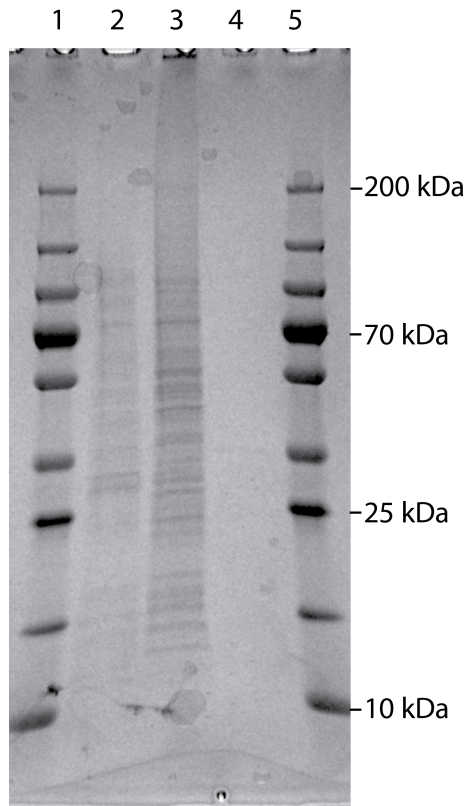

Supplementary Figure 2. Alignment and phylogenetic analysis of proteins related to MdBV *egf* genes in *M. demolitor* and other select hymenopteran species. A. An alignment of “CD” regions of *egf* family members and relatives, with conserved sites highlighted in blue. MdBV: *Microplitis demolitor* bracovirus, Am: *Apis mellifera*, Nv: *Nasonia vitripennis*. Expression values (RPKM) for each *M. demolitor* locus are shown using a heat-map. B. Phylogenetic reconstruction of the evolutionary history of *egf* relatives, using the same organism abbreviations as in A. comp38084\_c0 is the closest currently known relative of MdBV *egf* genes.

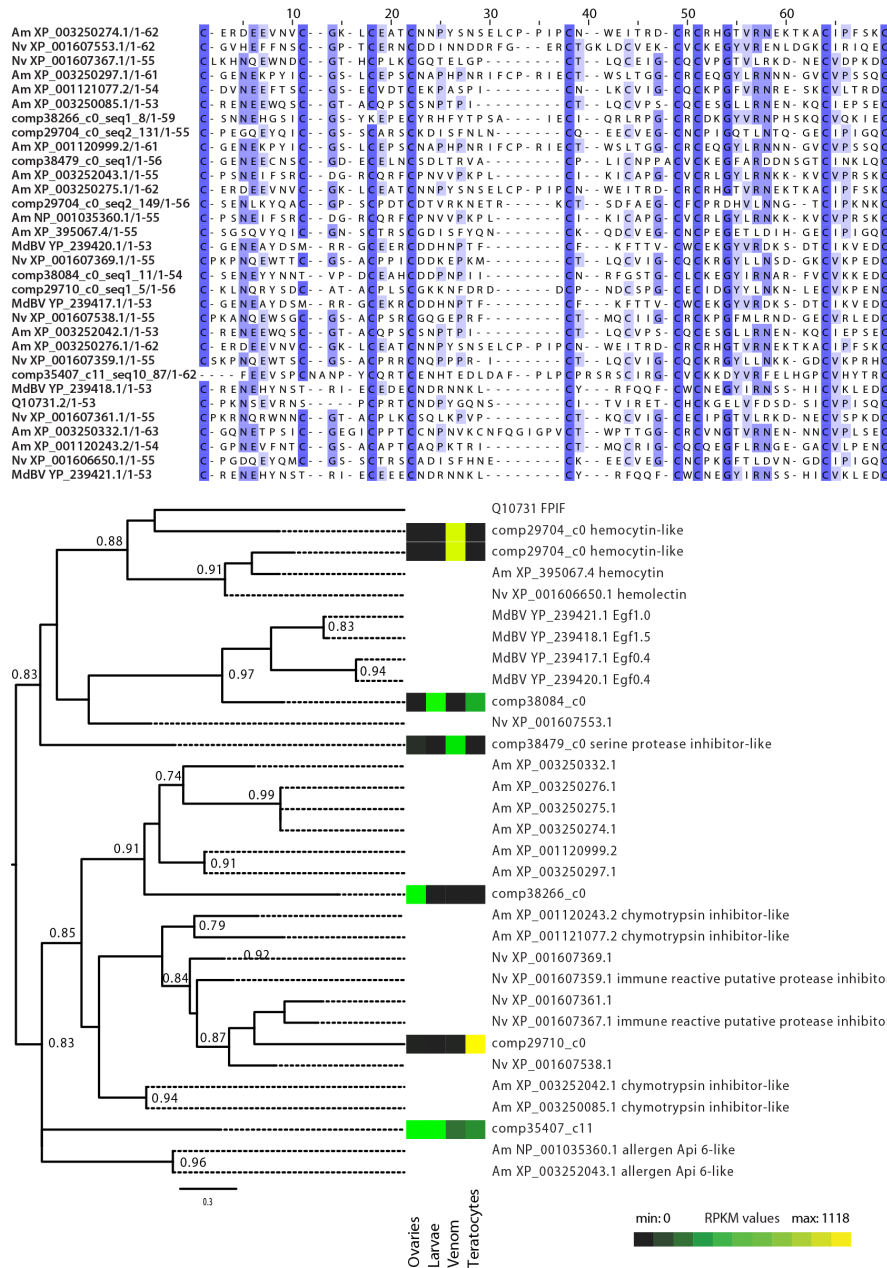

## References

1. Vincent B, Kaeslin M, Roth T, Heller M, Poulain J, Cousserans F, Schaller J, Poirié M, Lanzrein B, Drezen JM, *et al.* 2010 The venom composition of the parasitic wasp *Chelonus inanitus* resolved by combined expressed sequence tags analysis and proteomic approach. *BMC Genomics* **11**, 693. (doi:10.1186/1471-2164-11-693)
2. Dorémus T, Urbach S, Jouan V, Cousserans F, Ravallec M, Demettré E, Wajnberg E, Poulain J, Azéma-Dossat C, Darboux I, *et al.* 2013 Venom gland extract is not required for successful parasitism in the polydnavirus-associated endoparasitoid *Hyposoter didymator* (Hym. Ichneumonidae) despite the presence of numerous novel and conserved venom proteins. *Insect Biochem. Mol. Biol.* **43**, 292-307. (doi:10.1016/j.ibmb.2012.12.010)
3. de Graaf DC, Aerts M, Brunain M, Desjardins CA, Jacobs FJ, Werren JH, Devreese B. 2010 Insights into the venom composition of the ectoparasitoid wasp *Nasonia vitripennis* from bioinformatic and proteomic studies. *Insect Mol. Biol.* **19 Suppl 1**, 11-26. (doi:10.1111/j.1365-2583.2009.00914.x)
4. Crawford AM, Brauning R, Smolenski G, Ferguson C, Barton D, Wheeler TT, McCulloch A. 2008 The constituents of *Microctonus* sp. parasitoid venoms. *Insect Mol. Biol.* **17**, 313-324. (doi:10.1111/j.1365-2583.2008.00802.x)
5. Periquet G, Bigot Y, Doury G. 1997 Physiological and biochemical analysis of factors in the female venom gland and larval salivary secretions of the ectoparasitoid wasp *Eupelmus orientalis*. *J. Insect Physiol.* **43**, 69-81.
6. Asgari S, Zhang G, Zareie R, Schmidt O. 2003 A serine proteinase homolog venom protein from an endoparasitoid wasp inhibits melanization of the host hemolymph. *Insect Biochem. Mol. Biol.* **33**, 1017-1024.

7. Parkinson N, Conyers C, Smith I. 2002 A venom protein from the endoparasitoid wasp *Pimpla hypochondriaca* is similar to snake venom reprotolysin-type metalloproteases. *J. Invertebr. Pathol.* **79**, 129-131.
8. Zhu JY, Fang Q, Wang L, Hu C, Ye GY. 2010 Proteomic analysis of the venom from the endoparasitoid wasp *Pteromalus puparum* (Hymenoptera: Pteromalidae). *Arch. Insect Biochem. Physiol.* **75**, 28-44. (doi:10.1002/arch.20380)
9. Price DR, Bell HA, Hinchliffe G, Fitches E, Weaver R, Gatehouse JA. 2009 A venom metalloproteinase from the parasitic wasp *Eulophus pennicornis* is toxic towards its host, tomato moth (*Lacanobia oleraceae*). *Insect Mol. Biol.* **18**, 195-202. (doi:10.1111/j.1365-2583.2009.00864.x)
10. Colinet D, Dubuffet A, Cazes D, Moreau S, Drezen JM, Poirié M. 2009 A serpin from the parasitoid wasp *Leptopilina boulardi* targets the *Drosophila* phenoloxidase cascade. *Dev. Comp. Immunol.* **33**, 681-689. (doi:10.1016/j.dci.2008.11.013)
11. Gopalapillai R, Kadono-Okuda K, Okuda T. 2005 Molecular cloning and analysis of a novel teratocyte-specific carboxylesterase from the parasitic wasp, *Dinocampus coccinellae*. *Insect Biochem. Mol. Biol.* **35**, 1171-1180. (doi:10.1016/j.ibmb.2005.05.010)
12. Zhang D, Dahlman DL, Schepers EJ. 1998 *Microplitis croceipes* teratocytes: in vitro culture and biological activity of teratocyte secreted protein. *J. Insect Physiol.* **44**, 767-777.
13. Goecks J, Mortimer NT, Mobley JA, Bowersock GJ, Taylor J, Schlenke TA. 2013 Integrative approach reveals composition of endoparasitoid wasp venoms. *PLoS ONE.* **8**, e64125.
14. Heavner ME, Gueguen G, Rajwani R, Pagan PE, Small C, Govind S. 2013 Partial venom gland transcriptome of a *Drosophila* parasitoid wasp, *Leptopilina heterotoma*, reveals novel and

shared bioactive profiles with stinging Hymenoptera. *Gene*. **526**, 195-204.

15. Colinet D, Deleury E, Anselme C, Cazes D, Poulain J, Azema-Dossat C, Belghazi M, Gatti JL, Poirié M. 2013 Extensive inter- and intraspecific venom variation in closely related parasites targeting the same host: the case of *Leptopilina* parasitoids of *Drosophila*. *Insect Biochem. Mol. Biol.* **43**, 601-11.
